# Supplementary material for: GLI2 but not GLI1/GLI3 plays a central role in the induction of malignant phenotype of gallbladder cancer
Source: PubMed Central journal article supplement — Oncol Rep. 2021 Jan 22;45(3):997–1010. doi: 10.3892/or.2021.7947 (PMC7860001; doi:10.3892/or.2021.7947), 2021-01-22
Supplement: Supplementary_Data.pdf [file Supplementary_Data.pdf]

Figure S1. The knockdown efficiency of siRNAs for each target gene. NOZ, TYGBK-1, or TGBC2TKB cells were transfected with siRNAs targeting *GLI1*, *GLI2*, *GLI3*, *HIF-1 $\alpha$* , or negative control siRNA. The relative expression of (A) *Gli1*, (B) *Gli2*, (C) *Gli3*, and (D) *HIF-1 $\alpha$*  mRNA of each GBC cell lines were evaluated by real time RT-qPCR analysis 48 h later. \* $P < 0.05$ , \*\* $P < 0.01$  and \*\*\* $P < 0.001$ . Bar, mean  $\pm$  SD. siRNA or si, small interfering RNA; *GLI1*, glioma-associated oncogene homolog 1; *HIF-1 $\alpha$* , hypoxia-inducible factor 1 $\alpha$ ; GBC, gallbladder cancer; RT-qPCR, reverse transcription-quantitative PCR.

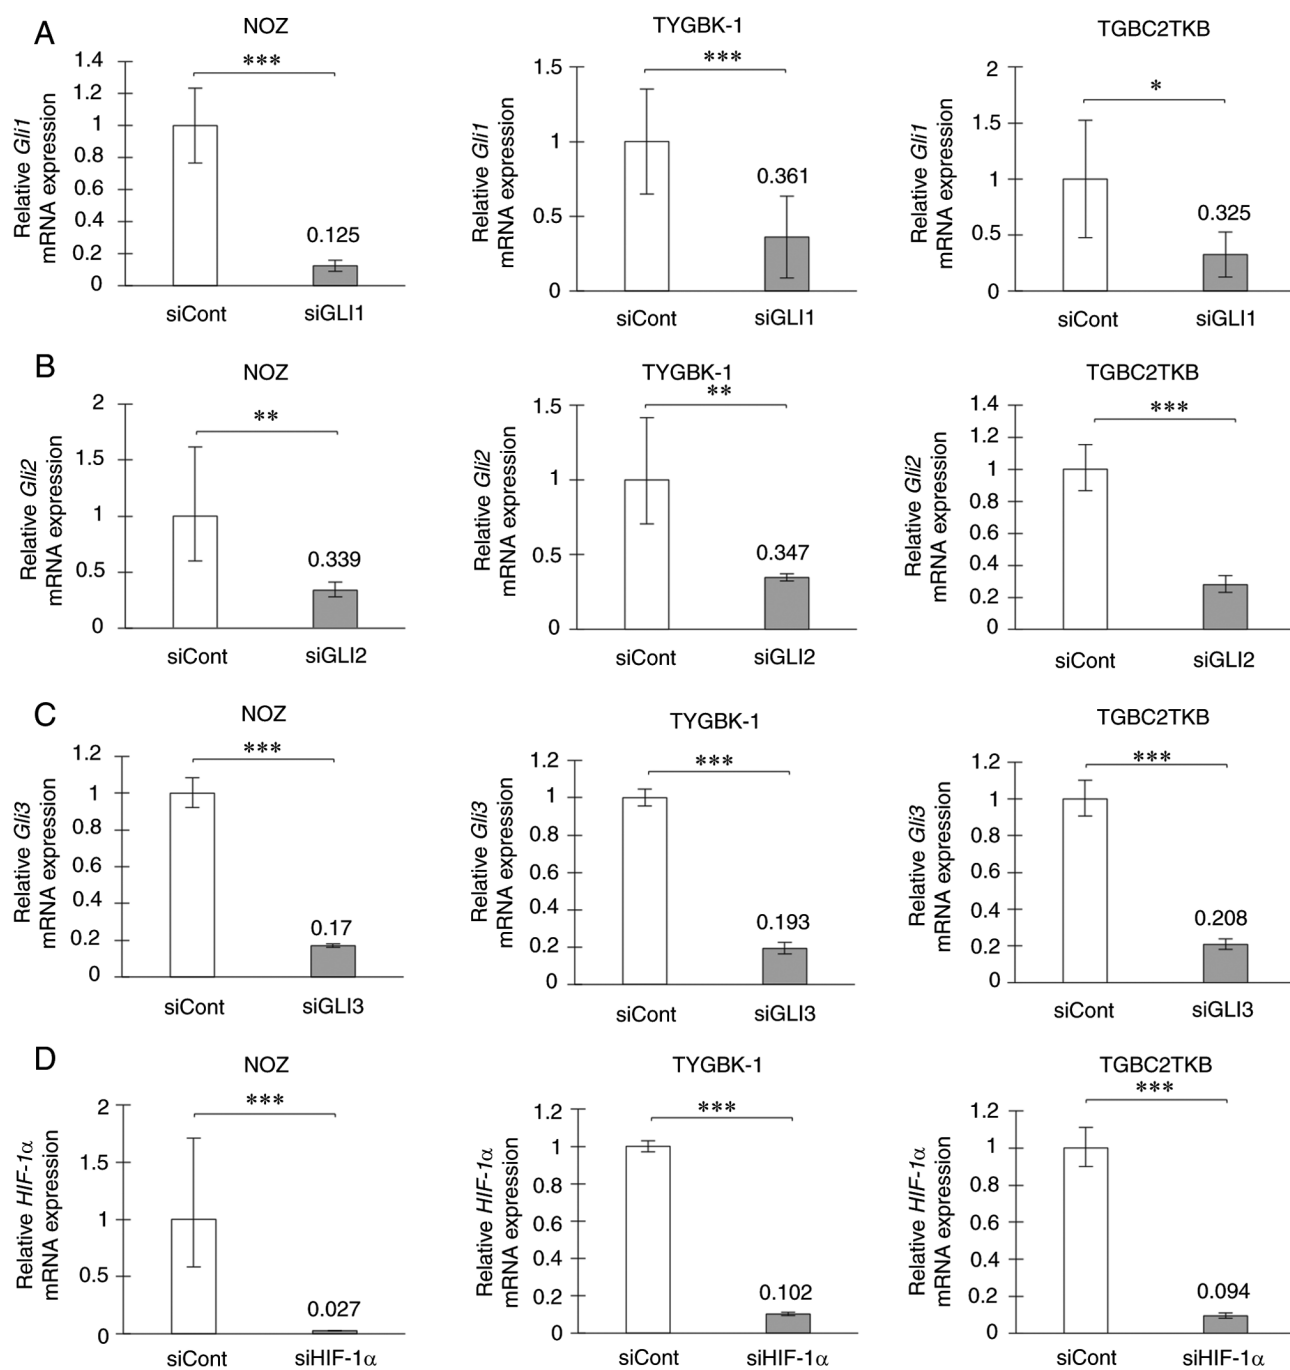

Figure S2. The knockdown efficacies of GLI2 mRNA in a GBC cell line during the time course after transfection. (A) NOZ cells were transfected with siRNAs targeting GLI2 or negative control siRNA. The relative expression of *Gli2* mRNA were evaluated by real time RT-qPCR analysis on days 0, 2, 5, 8, and 11. GLI2, glioma-associated oncogene homolog 2; GBC, gallbladder cancer; siRNA or si, small interfering RNA; RT-qPCR, reverse transcription-quantitative PCR.

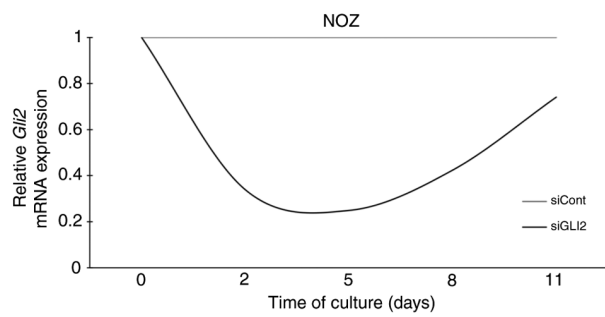

Figure S3. The 5-year survival rate in the patient group.  
(A) Kaplan-Meier survival curves of all GBC patients of all stages. GBC, gallbladder cancer.

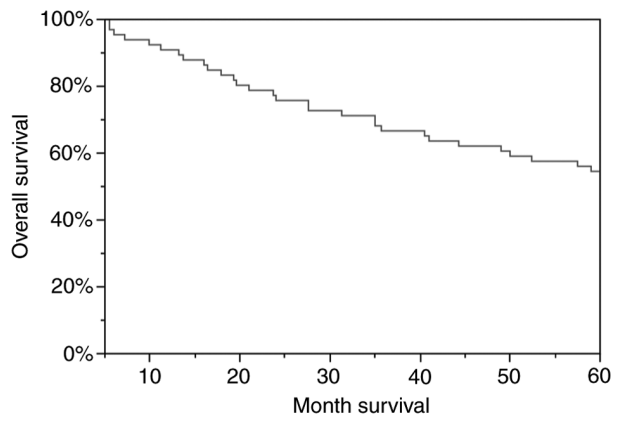

Table SI. Multivariate analysis using 66 GBC patients of overall survival.

| Variable                                | HR (95% CI)            | P-value |
|-----------------------------------------|------------------------|---------|
| UICC T category                         |                        |         |
| Tis/T1a and T1b/T2a and T2b/T3a and T3b | 1.8489 (0.7986-4.5378) | 0.1637  |
| UICC N category                         |                        |         |
| N0/N1                                   | 1.7976 (0.7072-4.8917) | 0.2299  |
| Lymphatic permeation                    |                        |         |
| ly(-)/ly(+)                             | 2.0405 (0.8499-5.3643) | 0.1251  |
| Venous invasion                         |                        |         |
| v(-)/v(+)                               | 1.4559 (0.5665-3.9295) | 0.4428  |
| PD-L1 expression                        |                        |         |
| Negative/Positive                       | 2.0328 (0.7755-5.1586) | 0.1384  |
| GLI2 expression                         |                        |         |
| Low expression/High expression          | 0.5727 (0.2345-1.3187) | 0.2025  |

GBC, gallbladder cancer; HR, hazard ratio; CI, confidence interval; UICC, Union for International Cancer Control; PD-L1, programmed cell death ligand 1; GLI2, glioma-associated oncogene homolog 2.

Table SII. Multivariate analysis using 66 GBC patients of overall survival.

| Variable                                | HR (95% CI)            | P-value |
|-----------------------------------------|------------------------|---------|
| Age                                     |                        |         |
| <69.5/≥69.5                             | 1.0227 (0.4717-2.2058) | 0.9541  |
| Sex                                     |                        |         |
| Female/Male                             | 1.3530 (0.5993-3.0548) | 0.4668  |
| UICC T category                         |                        |         |
| Tis/T1a and T1b/T2a and T2b/T3a and T3b | 1.9018 (0.9011-4.1502) | 0.0974  |
| UICC N category                         |                        |         |
| N0/N1                                   | 1.8257 (0.7024-5.0586) | 0.2273  |
| Lymphatic permeation                    |                        |         |
| ly(-)/ly(+)                             | 2.3010 (0.9354-6.1546) | 0.0796  |

GBC, gallbladder cancer; HR, hazard ratio; CI, confidence interval; UICC, Union for International Cancer Control.

Table SIII. Multivariate analysis using 66 GBC patients of overall survival.

| Variable                                | HR (95% CI)            | P-value |
|-----------------------------------------|------------------------|---------|
| UICC T category                         |                        |         |
| Tis/T1a and T1b/T2a and T2b/T3a and T3b | 1.9533 (0.9335-4.1999) | 0.0795  |
| UICC N category                         |                        |         |
| N0/N1                                   | 1.8894 (0.7463-5.1231) | 0.1911  |
| Lymphatic permeation                    |                        |         |
| ly(-)/ly(+)                             | 2.3806 (0.9973-6.2380) | 0.0610  |

GBC, gallbladder cancer; HR, hazard ratio; CI, confidence interval; UICC, Union for International Cancer Control.
